# Supplementary material for: Influence of a Major Mountainous Landscape Barrier (Mount Cameroon) on the Spread of Metabolic (GSTe2) and Target-Site (Rdl) Resistance Alleles in the African Malaria Vector Anopheles funestus
Source: Preprints.org preprint supplement (doi:10.20944/preprints202011.0277.v1), 2020-11-09
Supplement: Supplementary file 1 [file supplementary:Table%20S1.pdf]

**Table S1:** Detailed period (in years) of collections.

| Localities | Seasons         |                   |                   |                 |
|------------|-----------------|-------------------|-------------------|-----------------|
|            | Peak dry season | Mild rainy season | Peak rainy season | Mild dry season |
| Tiko       | 2014            | 2010              | 2013              | 2013            |
| Mutengene  | 2011            | 2011              | 2011              | 2011            |
| Meanja     | 2012            | 2010              | 2012              | 2012            |
| Likoko     | 2014            | 2010              | 2013              | 2013            |

Peak dry season: January – February;

Mild rainy season: March – April;

Peak rainy season: June – October;

Mild dry season: November – December.
