# Supplementary material for: Influence of a Major Mountainous Landscape Barrier (Mount Cameroon) on the Spread of Metabolic (GSTe2) and Target-Site (Rdl) Resistance Alleles in the African Malaria Vector Anopheles funestus
Source: Preprints.org preprint supplement (doi:10.20944/preprints202011.0277.v1), 2020-11-09
Supplement: Supplementary file 2 [file supplementary:Table%20S2.pdf]

**Table S2:** List of primers used in this study.

|                                                                                   | Forward primer 5'→3'                 | Reverse primer 5'→3'          | Expected size (bp)                                             |
|-----------------------------------------------------------------------------------|--------------------------------------|-------------------------------|----------------------------------------------------------------|
| <b>Genotyping of metabolic resistance</b>                                         |                                      |                               |                                                                |
| GSTe2Full <sup>o</sup>                                                            | GGAATTCCATATGACCAAGCTAGTTCTGTACACGCT | TCTAGATCAAGCTTTAGCATTTCCTCCTT | 846                                                            |
| L119F-Sus1 <sup>i</sup>                                                           | CATTTCTTATTCTCATTTACAGGAGCGTTATC     |                               | 312                                                            |
| L119F-Res1 <sup>i</sup>                                                           | CGAGGAATGTCCGATTTTCCGTAGAATA         |                               | 523                                                            |
| <b>TaqMan assay for the detection of resistance to dieldrin (Rdl)</b>             |                                      |                               |                                                                |
| SerRdl                                                                            | TCATATCGTGGGTATCATTTTGGCTAAAT        | TCGTTGACGACATCAGTGTTGT        |                                                                |
| WT2                                                                               | TTACACCTAATGCAACACG                  |                               | Probe specific for the wild-type allele A296 labelled with VIC |
| Ser                                                                               | CACCTAATGAAACACG                     |                               | Probe specific for the mutant allele 296S labelled with FAM    |
| <b>Primers used for amplifications of GSTe2 and Rdl for polymorphism analysis</b> |                                      |                               |                                                                |
| GSTe2Full                                                                         | GGAATTCCATATGACCAAGCTAGTTCTGTACACGCT | TCTAGATCAAGCTTTAGCATTTCCTCCTT | 846                                                            |
| Rdl0mut                                                                           | TGTCTGTAACCAAATACCTTCTTCT            | GATGCTGGGTTCGGTAAGTGT         | 1216                                                           |

o: outer primers; i: inner primers; In **green** is restriction site for *NdeI*, in **blue** is for *XbaI*.
