# Supplementary material for: Influence of a Major Mountainous Landscape Barrier (Mount Cameroon) on the Spread of Metabolic (GSTe2) and Target-Site (Rdl) Resistance Alleles in the African Malaria Vector Anopheles funestus
Source: Preprints.org preprint supplement (doi:10.20944/preprints202011.0277.v1), 2020-11-09
Supplement: Supplementary file 3 [file supplementary:Table%20S3.pdf]

**Table S3:** Genetic diversity parameters of *GSTe2* gene across Africa.

| Location       | N   | S* | h (Hd)    | Syn | NSyn                                                     | $\pi$ (k)     | D                   | F*                  |
|----------------|-----|----|-----------|-----|----------------------------------------------------------|---------------|---------------------|---------------------|
| Benin          | 24  | 1  | 2 (0.16)  | 0   | 1 (N35K)                                                 | 0.0002 (0.16) | -0.68 <sup>ns</sup> | 0.31 <sup>ns</sup>  |
| Ghana          | 16  | 19 | 12 (0.92) | 3   | 2 (L119F, E132K)                                         | 0.007 (4.82)  | -0.81 <sup>ns</sup> | -0.58 <sup>ns</sup> |
| Mount Cameroon | 72  | 14 | 13 (0.57) | 6   | 2 (D61E, L119F)                                          | 0.002 (1.36)  | -1.62 <sup>ns</sup> | -1.02 <sup>ns</sup> |
| North Cameroon | 12  | 16 | 8 (0.85)  | 6   | 7 (K79R, K79S, G81S, L119F, T146K, E197Q, G202S)         | 0.006 (4.26)  | -0.85 <sup>ns</sup> | -0.30 <sup>ns</sup> |
| Malawi         | 18  | 22 | 10 (0.88) | 3   | 8 (L36R, H69P, R110Q, R112P, K128E, N129D, E132K, T146K) | 0.007 (5.27)  | -0.69 <sup>ns</sup> | -0.08 <sup>ns</sup> |
| Mozambique     | 10  | 13 | 8 (0.96)  | 2   | 0                                                        | 0.005 (3.36)  | -1.47 <sup>ns</sup> | -1.69 <sup>ns</sup> |
| Uganda         | 10  | 17 | 9 (0.98)  | 0   | 3 (D40E, L119F, L175P)                                   | 0.009 (6.67)  | 0.51 <sup>ns</sup>  | 0.27 <sup>ns</sup>  |
| <i>All</i>     | 162 | 58 | 53 (0.86) | 15  | 18                                                       | 0.005 (3.72)  | -2.03*              | -2.09 <sup>ns</sup> |

N = number of sequences (2n); S\*, number of polymorphic sites; h, number of haplotypes (Hd = haplotype diversity); Syn, Synonymous mutations; NSyn, Non-synonymous mutations;  $\pi$ , nucleotide diversity (k = mean number of nucleotide differences); D and F\* Tajima's and Fu and Li's statistics; ns, not significant; \*,  $0.01 < p < 0.05$ .
